# Supplementary material
Source: PubMed Central journal article supplement (PMC6990377)
Supplement: mmc1.pdf [file mmc1.pdf]

**Biophysical Journal, Volume 117**

**Supplemental Information**

**A Spatiotemporal Ventricular Myocyte Model Incorporating Mitochondrial Calcium Cycling**

**Zhen Song, Lai-Hua Xie, James N. Weiss, and Zhilin Qu**

# A spatiotemporal ventricular myocyte model incorporating mitochondrial calcium cycling

Zhen Song<sup>1,\*</sup>, Lai-Hua Xie<sup>3</sup>, James N. Weiss<sup>1,4</sup>, and Zhilin Qu<sup>1,2,\*</sup>

Departments of Medicine<sup>1</sup> and Biomathematics<sup>2</sup>, David Geffen School of Medicine, University of California, Los Angeles, California, USA; Department of Cell Biology and Molecular Medicine<sup>3</sup>, Rutgers-New Jersey Medical School, Newark, New Jersey, USA; Departments of Physiology<sup>4</sup>, David Geffen School of Medicine, University of California, Los Angeles, California, USA

## Supplemental Information

The overall structure of the ventricular myocyte model is described in the Methods section and Fig.1 in the main text. Here we describe the detailed mathematical formulations and the parameters of the model.

### 1. Membrane potential and ionic currents

The governing differential equation for the membrane potential (V) is

$$C_m \frac{dV}{dt} = I_{Na} + I_{Na,L} + I_{K1} + I_{Kr} + I_{Ks} + I_{to,f} + I_{to,s} + I_{NaK} + I_{K,ATP} + I_{Ca,b} + I_{Ca,L} + I_{NCX} - I_{sti},$$

where  $I_{sti} = -50 \mu A/cm^2$  is the stimulus current density and  $C_m = 1 \mu F/cm^2$  is the cell membrane capacitance. The equations and functions for the ionic currents are detailed in the sub-sections below and their maximum conductance are listed in Table S1 except the ones stated in their corresponding sub-sections. The formulations for the ionic currents are mainly based on those from the rabbit ventricular myocyte model by Mahajan et al (1) except for the ones specifically stated. The physical constants and ion concentrations are listed in Table S2.

**Table S1. Maximum ionic current conductance**

| Parameter  | Description                    | Value              |
|------------|--------------------------------|--------------------|
| $g_{Na}$   | Maximum $I_{Na}$ conductance   | 12.0 mS/ $\mu F$   |
| $g_{Na,L}$ | Maximum $I_{Na,L}$ conductance | 0.0065 mS/ $\mu F$ |
| $g_{to,f}$ | Maximum $I_{to,f}$ conductance | 0.1 mS/ $\mu F$    |
| $g_{to,s}$ | Maximum $I_{to,s}$ conductance | 0.04 mS/ $\mu F$   |
| $g_{K1}$   | Maximum $I_{K1}$ conductance   | 0.6 mS/ $\mu F$    |
| $g_{Kr}$   | Maximum $I_{Kr}$ conductance   | 0.0078 mS/ $\mu F$ |
| $g_{Ks}$   | Maximum $I_{Ks}$ conductance   | 0.2 mS/ $\mu F$    |
| $g_{NaK}$  | Maximum $I_{NaK}$ conductance  | 1.5 mS/ $\mu F$    |

### 1.1. Na<sup>+</sup> current (I<sub>Na</sub>)

The I<sub>Na</sub> formulation is from Hund and Rudy (2), which incorporates CaMKII-dependent activation.

$$\begin{aligned}
 I_{\text{Na}} &= g_{\text{Na}} m^3 h j (V - E_{\text{Na}}), \\
 E_{\text{Na}} &= \frac{RT}{F} \ln \left( \frac{[\text{Na}^+]_o}{[\text{Na}^+]_i} \right), \\
 \frac{dh}{dt} &= \alpha_h (1 - h) - \beta_h h, \\
 \frac{dj}{dt} &= \alpha_j (1 - j) - \beta_j j, \\
 \frac{dm}{dt} &= \alpha_m (1 - m) - \beta_m m,
 \end{aligned}$$

**Table S2. Physical constants and ionic concentrations**

| Parameter                        | Description                      | Value                                    |
|----------------------------------|----------------------------------|------------------------------------------|
| F                                | Faraday constant                 | 96.5 C/mmol                              |
| R                                | Universal gas constant           | 8.315 Jmol <sup>-1</sup> K <sup>-1</sup> |
| T                                | Temperature                      | 308 K                                    |
| [Na <sup>+</sup> ] <sub>o</sub>  | External sodium concentration    | 136 mM                                   |
| [K <sup>+</sup> ] <sub>o</sub>   | External potassium concentration | 5.4 mM                                   |
| [K <sup>+</sup> ] <sub>i</sub>   | Internal potassium concentration | 140 mM                                   |
| [Ca <sup>2+</sup> ] <sub>o</sub> | External calcium concentration   | 1.8 mM                                   |

$$\begin{aligned}
 \alpha_m &= 0.32 \frac{V + 47.13}{1 - e^{-0.1(V+47.13)}}, \\
 \beta_m &= 0.08 e^{-\frac{V}{11}},
 \end{aligned}$$

For  $V - \Delta V_{\text{Na}} \geq -40$  mV,

$$\begin{aligned}
 \alpha_h &= 0, \\
 \alpha_j &= 0, \\
 \beta_h &= \frac{1}{0.13 \left( 1 + e^{\frac{V+10.66-\Delta V_{\text{Na}}}{-11.1}} \right)}, \\
 \beta_j &= 0.3 \frac{e^{-2.535 \times 10^{-7}(V-\Delta V_{\text{Na}})}}{1 + e^{-0.1(V+32-\Delta V_{\text{Na}})}},
 \end{aligned}$$

For  $V - \Delta V_{\text{Na}} < -40$  mV,

$$\begin{aligned}
 \alpha_h &= 0.135 e^{\frac{V+80-\Delta V_{\text{Na}}}{-6.8}}, \\
 \beta_h &= 3.56 e^{0.079(V-\Delta V_{\text{Na}})} + 3.1 \times 10^5 e^{0.35(V-\Delta V_{\text{Na}})}, \\
 \alpha_j &= (1 + \Delta \alpha_j) \cdot \frac{(-127140 e^{0.2444(V-\Delta V_{\text{Na}})} - 0.03474 e^{-0.04391(V-\Delta V_{\text{Na}})}) \times (V + 37.78 - \Delta V_{\text{Na}})}{1 + e^{0.311(V+79.23-\Delta V_{\text{Na}})}}, \\
 \beta_j &= \frac{0.1212 e^{-0.01052(V-\Delta V_{\text{Na}})}}{1 + e^{-0.1378(V+40.14-\Delta V_{\text{Na}})}},
 \end{aligned}$$

where

$$\Delta V_{\text{Na}} = \frac{-3.25}{1 + \left( \frac{K_{\text{m,CaMK}}}{[\text{CaMKII}]_{\text{act}}} \right)^4},$$

$$\Delta\alpha_j = \frac{-0.18}{1 + \left(\frac{K_{m,CaMK}}{[CaMKII]_{act}}\right)^4}$$

$K_{m,CaMK}=0.3$  was used.

### 1.2. Late $Na^+$ current ( $I_{Na,L}$ )

The  $I_{Na,L}$  formulation is from Hund and Rudy (2), which incorporates CaMKII-dependent activation.

$$I_{Na,L} = (g_{Na,L} + \Delta g_{Na,L}) \cdot m_L^3 h_L \cdot (V - E_{Na}),$$

$$\frac{dm_L}{dt} = \alpha_{m,L}(1 - m_L) - \beta_{m,L} m_L,$$

$$\frac{dh_L}{dt} = \frac{h_{L,\infty} - h_L}{\tau_{h,L}},$$

For  $V \geq -47.13$  mV,

$$\alpha_{m,L} = 0.32 \frac{V + 47.13}{1 - e^{-0.1(V+47.13)'}}$$

else

$$\alpha_{m,L} = 3.2,$$

$$\beta_{m,L} = 0.08e^{-\frac{V}{11}},$$

$$h_{L,\infty} = \frac{1}{1 + e^{\frac{V+91}{6.1}}}$$

$$\tau_{h,L} = 600 \text{ ms},$$

$$\Delta g_{Na,L} = \frac{0.0095}{1 + \left(\frac{K_{m,CaMK}}{[CaMKII]_{act}}\right)^4}$$

$K_{m,CaMK}=0.3$  was used.

### 1.3. L-type $Ca^{2+}$ current ( $I_{Ca,L}$ )

L-type  $Ca^{2+}$  channels (LCCs) are simulated by a stochastic 9-state Markov model (see Fig.1C) that were developed based a Hodgkin-Huxley formulation (3). However, a directly randomized version of the Hodgkin-Huxley-type formulation is not appropriate for an LCC, because the maximum open probability of an LCC is 100% in the Hodgkin-Huxley-type model at high voltages, whereas that of real channels is much smaller (~5%-10%). Therefore, we added a new state (the final open state) to simulate a much lower channel open probability (~5%-10%) observed in experiments.

Each CRU has a LCC cluster of 5 LCCs under the control condition. The  $Ca^{2+}$  current through the LCC cluster into the proximal space (dyadic space) of a CRU is given by

$$\bar{I}_{Ca,L} = n \cdot i_{Ca,L}$$

where  $n \leq 5$  is the number of open LCCs in the CRU, and  $i_{Ca,L}$  is the single LCC current, which is:

$$i_{Ca,L} = \frac{4P_{Ca}zF(\gamma_i [Ca^{2+}]_p e^{2z} - \gamma_o [Ca^{2+}]_o)}{e^{2z} - 1},$$

$$z = \frac{VF}{RT}$$

$[Ca^{2+}]_p$  is the  $Ca^{2+}$  concentration in the corresponding proximal space of the CRU. Therefore, the whole-cell L-type  $Ca^{2+}$  current ( $I_{Ca,L}$ ) is a summation of the  $Ca^{2+}$  currents of all CRUs in the cell,

i.e.,

$$I_{Ca,L} = \sum_{m=1}^M \bar{I}_{Ca,L}^{(m)}$$

where  $M$  is total number of CRUs in the cell, and  $\bar{I}_{Ca,L}^{(m)}$  is the LCC current in the  $m^{\text{th}}$  CRU.

The transition rates of the LCC model are as follows:

$$\alpha_d = \frac{d_\infty}{\tau_d}, \quad \beta_d = \frac{1 - d_\infty}{\tau_d},$$

where

$$d_\infty = \frac{1}{1 + e^{-\frac{V-5}{6.24}}},$$

$$\tau_d = \frac{1 - e^{-\frac{V-5}{6.24}}}{0.035(V-5)} d_\infty.$$

$$\alpha_f = \frac{f_\infty}{\tau_f}, \quad \beta_f = \frac{1 - f_\infty}{\tau_f}$$

where

$$f_\infty = \frac{1}{1 + e^{-\frac{V+16.06}{8.6}}},$$

$$\tau_f = \frac{1}{0.0197e^{-[0.0337(V-9)]^2} + 0.02} + \Delta\tau_{f,CaMK}.$$

$$\alpha_{fCa} = \frac{f_{Ca,\infty}}{\tau_{fCa}}, \quad \beta_{fCa} = \frac{1 - f_{Ca,\infty}}{\tau_{fCa}},$$

where

$$f_{Ca,\infty} = \frac{1}{1 + \left(\frac{[Ca^{2+}]_p}{\bar{c}_p}\right)^2},$$

$$\tau_{fCa} = 15 + \Delta\tau_{fCa,CaMK}.$$

The rate constants  $r_1$  and  $r_2$  are constants, which are chosen to account for 5%-10% open probability of LCC (1).

CaMKII-dependent  $Ca^{2+}$  channel phosphorylation results in a slower inactivation (4). Here, we use the formulation by Hund et al (5) to change the LCC inactivation time constants as follows:

$$\Delta\tau_{fCa,CaMK} = \frac{\Delta\tau_{fCa,CaMK,max}}{1 + \left(\frac{k_mCaMLCC}{[CaMKII]_{act}}\right)^{h_{CaMLCC}}},$$

$$\Delta\tau_{f,CaMK} = \frac{\Delta\tau_{f,CaMK,max}}{1 + \left(\frac{k_mCaMLCC}{[CaMKII]_{act}}\right)^{h_{CaMLCC}}}.$$

The corresponding parameters for the  $I_{Ca,L}$  model are listed in Table S3.

**Table S3. L-type  $Ca^{2+}$  current parameters**

| Parameter                   | Description                                                                | Value                                    |
|-----------------------------|----------------------------------------------------------------------------|------------------------------------------|
| $P_{Ca}$                    | LCC permeability                                                           | $11.9 \mu\text{molC}^{-1}\text{ms}^{-1}$ |
| $\gamma_i, \gamma_o$        | Activity coefficient of $Ca^{2+}$                                          | 0.341                                    |
| $k_{mCaMLCC}$               | $K_D$ of CaMKII activation on LCC                                          | 0.1                                      |
| $h_{CaMLCC}$                | Hill coefficient of CaMKII activation on LCC                               | 4                                        |
| $\bar{c}_p$                 | $Ca^{2+}$ -dependent inactivation constant of LCC                          | 20 $\mu\text{M}$                         |
| $r_1$                       | Opening rate                                                               | $0.3 \text{ms}^{-1}$                     |
| $r_2$                       | Closing rate                                                               | $6 \text{ms}^{-1}$                       |
| $\tau_{fCa}$                | Time constant of $Ca^{2+}$ -dependent inactivation                         | 15 ms                                    |
| $\Delta\tau_{fCa,CaMK,max}$ | Maximum increase of the time constant of $Ca^{2+}$ -dependent inactivation | 5 ms                                     |
| $\Delta\tau_{f,CaMK,max}$   | Maximum increase of the time constant of voltage-dependent inactivation    | 5 ms                                     |

#### 1.4. $Na^+$ - $Ca^{2+}$ exchange current ( $I_{NCX}$ )

The  $Na^+$ - $Ca^{2+}$  exchangers are spatially distributed in the CRUs, which senses the  $Ca^{2+}$  concentrations of their local sub-membrane spaces ( $[Ca^{2+}]_s$ ). The  $Na^+$ - $Ca^{2+}$  exchange current in a single CRU is

$$\bar{I}_{NCX} = \frac{K_a v_{NaCa} (e^{\eta z} [Na^+]_i^3 [Ca^{2+}]_o - e^{(\eta-1)z} [Na^+]_o^3 [Ca^{2+}]_s)}{(t_1 + t_2 + t_3)(1 + k_{sat} e^{(\eta-1)z})},$$

where

$$t_1 = K_{mCai} [Na^+]_o^2 \left[ 1 + \left( \frac{[Na^+]_i}{K_{mNai}} \right)^3 \right],$$

$$t_2 = K_{mNao}^3 [Ca^{2+}]_s \left( 1 + \frac{[Ca^{2+}]_s}{K_{mCai}} \right)$$

$$t_3 = K_{mCao}^3 [Na^+]_i^3 + [Na^+]_i^3 [Ca^{2+}]_o + [Na^+]_o^3 [Ca^{2+}]_s,$$

$$K_a = \left[ 1 + \left( \frac{K_{da}}{[Ca^{2+}]_s} \right)^3 \right]^{-1},$$

$$z = \frac{VF}{RT},$$

and the whole-cell  $I_{NCX}$  is

$$I_{NCX} = \sum_m^M \bar{I}_{NCX}^{(m)},$$

where  $M$  is total number of CRUs in the cell, and  $\bar{I}_{NCX}^{(m)}$  is the LCC current in the  $m^{\text{th}}$  CRU. The parameters are listed in Table S4.

**Table S4. Na<sup>+</sup>-Ca<sup>2+</sup> exchange current parameters**

| Parameter  | Value | Units                              |
|------------|-------|------------------------------------|
| $v_{NaCa}$ | 21    | $\mu\text{M} \cdot \text{ms}^{-1}$ |
| $K_{mCai}$ | 3.59  | $\mu\text{M}$                      |
| $K_{mCao}$ | 1.3   | mM                                 |
| $K_{mNai}$ | 12.3  | mM                                 |
| $K_{mNao}$ | 87.5  | mM                                 |
| $K_{da}$   | 0.11  | $\mu\text{M}$                      |
| $K_{sat}$  | 0.27  |                                    |
| $\eta$     | 0.35  |                                    |

**1.5. Inward rectifier K<sup>+</sup> current (I<sub>K1</sub>)**

$$I_{K1} = g_{K1} \sqrt{\frac{[K^+]_o}{5.4}} \frac{A_{K1}}{A_{K1} + B_{K1}} (V - E_K),$$

$$A_{K1} = \frac{1.02}{1 + e^{0.2385(V - E_K - 59.215)}},$$

$$B_{K1} = \frac{0.49124e^{0.08032(V - E_K + 5.476)} + e^{0.06175(V - E_K - 59.431)}}{1 + e^{-0.5143(V - E_K + 4.753)}},$$

$$E_K = \frac{RT}{F} \ln \left( \frac{[K^+]_o}{[K^+]_i} \right).$$

**1.6. The rapid component of the delayed rectifier K<sup>+</sup> current (I<sub>Kr</sub>)**

$$I_{Kr} = g_{Kr} \sqrt{\frac{[K^+]_o}{5.4}} x_{Kr} R(V) (V - E_K),$$

$$R(V) = \frac{1}{1 + e^{\frac{V+33}{22.4}}},$$

$$\frac{dx_{Kr}}{dt} = \frac{x_{Kr,\infty} - x_{Kr}}{\tau_{Kr}},$$

$$x_{Kr,\infty} = \frac{1}{1 + e^{\frac{V+50}{7.5}}},$$

$$\tau_{Kr} = \frac{1}{\frac{0.00138(V+7)}{1 - e^{-0.123(V+7)}} + \frac{0.00061(V+10)}{-1 + e^{0.145(V+10)}}}.$$

### 1.7. The slow component of the delayed rectifier $K^+$ current ( $I_{Ks}$ )

$$I_{Ks} = g_{Ks} x_{s1} x_{s2} q_{Ks} (V - E_{Ks}),$$

$$q_{Ks} = 1 + \frac{0.8}{1 + \left( \frac{0.5}{[Ca^{2+}]_i} \right)^3},$$

$$\frac{dx_{s1}}{dt} = \frac{x_{s,\infty} - x_{s1}}{\tau_{xs1}},$$

$$\frac{dx_{s2}}{dt} = \frac{x_{s,\infty} - x_{s2}}{\tau_{xs2}},$$

$$x_{s,\infty} = \frac{1}{1 + e^{-\frac{V-1.5}{16.7}}},$$

$$\tau_{xs1} = \frac{1}{\frac{0.0000719(V+30)}{1 - e^{-0.148(V+30)}} + \frac{0.00031(V+30)}{-1 + e^{0.0687(V+30)}}},$$

$$\tau_{xs2} = 4\tau_{xs1},$$

$$E_{Ks} = \frac{RT}{F} \ln \left( \frac{[K^+]_o + 0.01833[Na^+]_o}{[K^+]_i + 0.01833[Na^+]_i} \right).$$

### 1.8. The fast component of the outward $K^+$ current ( $I_{to,f}$ )

$$I_{to,f} = g_{to,f} X_{to,f} Y_{to,f} (V - E_K),$$

$$X_{to,f,\infty} = \frac{1}{1 + e^{-\frac{V+3}{15}}},$$

$$Y_{to,f,\infty} = \frac{1}{1 + e^{-\frac{V+33.5}{10}}},$$

$$\tau_{Xto,f} = 3.5e^{-\left(\frac{V}{30}\right)^2} + 1.5,$$

$$\tau_{Yto,f} = \frac{20}{1 + e^{-\frac{V+33.5}{10}}} + 20,$$

$$\frac{dX_{to,f}}{dt} = \frac{X_{to,f,\infty} - X_{to,f}}{\tau_{Xto,f}},$$

$$\frac{dY_{to,f}}{dt} = \frac{Y_{to,f,\infty} - Y_{to,f}}{\tau_{Yto,f}}.$$

### 1.9. The slow component of the outward $K^+$ current ( $I_{to,s}$ )

$$I_{to,s} = g_{to,s} X_{to,s} (Y_{to,s} + 0.5 R_{s,\infty}) (V - E_K),$$

$$R_{s,\infty} = \frac{1}{1 + e^{-\frac{V+33.5}{10}}},$$

$$X_{to,s,\infty} = \frac{1}{1 + e^{-\frac{V+3}{15}}},$$

$$Y_{to,s,\infty} = \frac{1}{1 + e^{-\frac{(V+33.5)}{10}}},$$

$$\tau_{Xto,s} = \frac{9}{1 + e^{-\frac{V+3}{15}}} + 0.5,$$

$$\tau_{Yto,s} = \frac{3000}{1 + e^{-\frac{V+60}{10}}} + 30,$$

$$\frac{dX_{to,s}}{dt} = \frac{X_{to,s,\infty} - X_{to,s}}{\tau_{Xto,s}},$$

$$\frac{dY_{to,s}}{dt} = \frac{Y_{to,s,\infty} - Y_{to,s}}{\tau_{Yto,s}}.$$

### 1.10. Na<sup>+</sup>/K<sup>+</sup> pump current (I<sub>NaK</sub>)

The Na<sup>+</sup>/K<sup>+</sup> pump current formulation is from Cortassa et al (6) to incorporate the ATP and ADP dependence of I<sub>NaK</sub>:

$$I_{NaK} = g_{NaK} \cdot f_{NaK} \cdot f_{NaK,ATP} \frac{1}{1 + \left(\frac{k_{m,Na_i}}{[Na^+]_i}\right)} \frac{[K^+]_o}{[K^+]_o + k_{m,Ko}},$$

where

$$f_{NaK} = \frac{1}{1 + 0.1245e^{-0.1\frac{VF}{RT}} + 0.0365e^{-\frac{VF}{RT}} \left(\frac{e^{\frac{[Na^+]_o}{67.3}} - 1}{7}\right)},$$

$$f_{NaK,ATP} = \frac{1}{1 + \frac{k_{i,NaK,ATP}}{[ATP]} \cdot \left(1 + \frac{[ADP]}{k_{i,NaK,ADP}}\right)}.$$

The parameters are listed in Table S5.

**Table S5. Na<sup>+</sup>/K<sup>+</sup> pump current parameters**

| Parameter                     | Description                                                              | Value  |
|-------------------------------|--------------------------------------------------------------------------|--------|
| k <sub>i,NaK,ATP</sub>        | ATP half-saturation constant for Na <sup>+</sup> /K <sup>+</sup> pump    | 8 μM   |
| k <sub>i,NaK,ADP</sub>        | ADP inhibition constant for Na <sup>+</sup> /K <sup>+</sup> pump         | 100 μM |
| k <sub>m,Na<sub>i</sub></sub> | Na <sup>+</sup> half-saturation for Na <sup>+</sup> /K <sup>+</sup> pump | 10 mM  |
| k <sub>m,K<sub>o</sub></sub>  | K <sup>+</sup> half-saturation for Na <sup>+</sup> /K <sup>+</sup> pump  | 1.5 mM |

### 1.11. ATP-sensitive K<sup>+</sup> current (I<sub>KATP</sub>)

The formulation of ATP-sensitive K<sup>+</sup> current (I<sub>KATP</sub>) is from Matsuoka et al (7):

$$I_{KATP} = 2333 \cdot \gamma \cdot (V - E_k) \cdot p_{KATP},$$

where

$$\begin{aligned} \gamma &= 0.0236 \cdot ([K^+]_o)^{0.24}, \\ E_k &= \frac{RT}{F} \ln \frac{[K^+]_o}{[K^+]_i}, \\ p_{KATP} &= \frac{1}{1 + (10 \cdot [ATP])^2}. \end{aligned}$$

### 1.12. Background Ca<sup>2+</sup> current (I<sub>Ca,b</sub>)

The formulation of the background Ca<sup>2+</sup> current is from Shannon et al (8). In this model, the background Ca<sup>2+</sup> current is spatially distributed in the CRUs, which senses the Ca<sup>2+</sup> concentrations of their local cytosolic space ([Ca<sup>2+</sup>]<sub>i</sub>). The background current in a single CRU is

$$\begin{aligned} \bar{I}_{Ca,b} &= v_{cab} \cdot (V - E_{Ca}), \\ E_{Ca} &= \frac{RT}{2F} \ln \left( \frac{[Ca^{2+}]_o}{[Ca^{2+}]_i} \right), \end{aligned}$$

where  $v_{cab} = 0.0002513 \text{ mS} \cdot \mu\text{F}$ .

The whole-cell background Ca<sup>2+</sup> current is

$$I_{Ca,b} = \sum_m^M \bar{I}_{Ca,b}^{(m)},$$

where M is total number of CRUs in the cell, and  $\bar{I}_{Ca,b}^{(m)}$  is the background Ca<sup>2+</sup> current in the m<sup>th</sup> CRU.

## 2. Intracellular Ca<sup>2+</sup> cycling

The differential equations for the Ca<sup>2+</sup> concentrations in different sub-spaces of a CRU are as follows:

$$\begin{aligned} \frac{d[Ca^{2+}]_i}{dt} &= \beta_i([Ca^{2+}]_i) \left( J_{dsi} \frac{v_s}{v_i} - J_{up} + J_{leak} + J_{cab} - J_{TCi} + J_{ci} + h_{mito} \cdot \frac{v_m}{v_i} \right. \\ &\quad \left. \cdot (J_{NCXm} - (1 - f_p - f_s) \cdot J_{uni} + J_{MPTP}) \right), \\ \frac{d[Ca^{2+}]_s}{dt} &= \beta_s([Ca^{2+}]_s) \left( J_{dps} \frac{v_p}{v_s} + J_{NCX} - h_{mito} \cdot f_s \cdot J_{uni} \cdot \frac{v_m}{v_s} - J_{dsi} - J_{TCs} + J_{cs} \right), \\ \frac{d[Ca^{2+}]_p}{dt} &= \beta_p([Ca^{2+}]_p) \left( J_r + J_{Ca} - J_{dps} - h_{mito} \cdot f_p \cdot J_{uni} \cdot \frac{v_m}{v_p} \right), \\ \frac{d[Ca^{2+}]_{NSR}}{dt} &= \left( (J_{up} - J_{leak}) \frac{v_i}{v_{NSR}} - J_{tr} \frac{v_{JSR}}{v_{NSR}} + J_{cNSR} \right), \\ \frac{d[Ca^{2+}]_{JSR}}{dt} &= \beta_{JSR}([Ca^{2+}]_{JSR}) \left( J_{tr} - J_r \frac{v_p}{v_{JSR}} \right), \\ \frac{d[CaT]_i}{dt} &= J_{TCi}, \end{aligned}$$

$$\frac{d[\text{CaT}]_s}{dt} = J_{\text{TCS}},$$

where  $h_{\text{mito}}=1$ , if a mitochondrion connects to the CRU, otherwise  $h_{\text{mito}}=0$ .  $f_p$  is the fraction of MCUs facing the proximal space, and  $f_s$  is the fraction of MCUs facing the submembrane space. The volumes of different compartments are listed in Table S6. Intracellular  $\text{Ca}^{2+}$  cycling parameters are listed in Table S7. The diffusion flux and buffers of the intracellular  $\text{Ca}^{2+}$  cycling remain the same as in (3, 9, 10). Mitochondrial  $\text{Ca}^{2+}$  cycling parameters are listed in Table S8.

**Table S6. Effective volumes of different compartments**

| Parameter        | Description                 | Value                   |
|------------------|-----------------------------|-------------------------|
| $v_i$            | Local cytosolic volume      | $0.5 \mu\text{m}^3$     |
| $v_s$            | Local submembrane volume    | $0.025 \mu\text{m}^3$   |
| $v_p$            | Local proximal space volume | $0.00126 \mu\text{m}^3$ |
| $v_{\text{JSR}}$ | Local JSR volume            | $0.02 \mu\text{m}^3$    |
| $v_{\text{NSR}}$ | Local NSR volume            | $0.025 \mu\text{m}^3$   |
| $v_m$            | Local mitochondrial volume  | $0.33 \mu\text{m}^3$    |

## 2.1. $\text{Ca}^{2+}$ diffusion within a CRU

$$J_{\text{dsi}} = \frac{[\text{Ca}^{2+}]_s - [\text{Ca}^{2+}]_i}{\tau_{\text{si}}},$$

$$J_{\text{dps}} = \frac{[\text{Ca}^{2+}]_p - [\text{Ca}^{2+}]_s}{\tau_{\text{ps}}},$$

$$J_{\text{tr}} = \frac{[\text{Ca}^{2+}]_{\text{NSR}} - [\text{Ca}^{2+}]_{\text{JSR}}}{\tau_{\text{tr}}}.$$

The diffusion time constants are listed in Table S7.

## 2.2. $\text{Ca}^{2+}$ diffusion among neighboring CRUs

The  $\text{Ca}^{2+}$  diffusive fluxes within cytosol, submembrane, and NSR are:

$$J_c^{(n)} = \sum \left( \frac{c^{(m)} - c^{(n)}}{\tau_{mn}} \right),$$

where the sum is over the six nearest neighbors. The diffusion time constants for  $\text{Ca}^{2+}$  in cytosol, submembrane and NSR in longitudinal and transverse directions are listed in Table S7.

**Table S7. Intracellular calcium diffusive time scales**

| Parameter             | Description              | Value    |
|-----------------------|--------------------------|----------|
| $\tau_{\text{si}}$    | Submembrane to cytoplasm | 0.1 ms   |
| $\tau_{\text{ps}}$    | Proximal to submembrane  | 0.022 ms |
| $\tau_{\text{tr}}$    | JSR refilling            | 5 ms     |
| $\tau_{i,T}$          | Transverse cytosolic     | 2.93 ms  |
| $\tau_{i,L}$          | Longitudinal cytosolic   | 2.32 ms  |
| $\tau_{\text{NSR,T}}$ | Transverse NSR           | 7.2 ms   |
| $\tau_{\text{NSR,L}}$ | Longitudinal NSR         | 24 ms    |
| $\tau_{s,T}$          | Transverse submembrane   | 1.42 ms  |
| $\tau_{s,L}$          | Longitudinal submembrane | 3.4 ms   |

### 2.3. Troponin C buffering

$J_{TCi}$  and  $J_{TCs}$  describe the rates of change in the concentration of  $Ca^{2+}$  bound to Troponin C in the cytosolic ( $[CaT]_i$ ) and submembrane ( $[CaT]_s$ ) compartments,

$$J_{TCi} = k_{on,T} [Ca^{2+}]_i (B_T - [CaT]_i) - k_{off,T} [CaT]_i,$$

$$J_{TCs} = k_{on,T} [Ca^{2+}]_s (B_T - [CaT]_s) - k_{off,T} [CaT]_s.$$

The rate constants are given in Table S8.

### 2.4. Instantaneous cytosolic $Ca^{2+}$ buffering

The instantaneous cytosolic  $Ca^{2+}$  buffering constant  $\beta_i(c_i)$  is:

$$\beta_i(c_i) = \left[ 1 + \frac{\sum B_b K_b}{(c_i + K_b)^2} \right]^{-1},$$

where the sum is over the instantaneous cytosolic buffers Calmodulin, SR sites, Myosin ( $Ca^{2+}$ ), and Myosin ( $Mg^{2+}$ ), with buffer dissociation constants  $K_{CAM}$ ,  $K_{SR}$ ,  $K_{Mca}$ , and  $K_{MMg}$  and total concentration of buffering sites  $B_{CAM}$ ,  $B_{SR}$ ,  $B_{Mca}$ , and  $B_{MMg}$ , respectively. The parameters are listed in Table S8.

**Table S8. Cytosolic buffering parameters**

| Parameter   | Description                                                 | Value                       |
|-------------|-------------------------------------------------------------|-----------------------------|
| $k_{on,T}$  | Rate constant of $Ca^{2+}$ binding to Troponin C            | $0.0327 \mu M^{-1} ms^{-1}$ |
| $k_{off,T}$ | Rate constant of $Ca^{2+}$ unbinding from Troponin C        | $0.0196 ms^{-1}$            |
| $K_{CAM}$   | Dissociation constant for Calmodulin                        | $7 \mu M$                   |
| $B_{CAM}$   | Total concentration of Calmodulin buffering sites           | $24 \mu M$                  |
| $K_{SR}$    | Dissociation constant for SR sites                          | $0.6 \mu M$                 |
| $B_{SR}$    | Total concentration of SR sites                             | $47 \mu M$                  |
| $K_{Mca}$   | Dissociation constant for Myosin ( $Ca^{2+}$ )              | $0.033 \mu M$               |
| $B_{Mca}$   | Total concentration of Myosin ( $Ca^{2+}$ ) buffering sites | $140 \mu M$                 |
| $K_{MMg}$   | Dissociation constant for Myosin ( $Mg^{2+}$ )              | $3.64 \mu M$                |
| $B_{MMg}$   | Total concentration of Myosin ( $Mg^{2+}$ ) buffering sites | $140 \mu M$                 |

### 2.5. Instantaneous luminal $Ca^{2+}$ buffering

$\beta_{JSR}([Ca^{2+}]_{JSR})$  describes instantaneous luminal  $Ca^{2+}$  buffering to calsequestrin (CSQN). The expression of  $\beta_{JSR}([Ca^{2+}]_{JSR})$  (denoted as  $\beta(c)$  for simplicity) is

$$\beta(c) = \left( 1 + \frac{K_c B_{CSQN} n(c) + \partial_c n(c) (c K_c + c^2)}{(K_c + c)^2} \right)^{-1},$$

where

$$n(c_{JSR}) = \hat{M} n_M + (1 - \hat{M}) n_D,$$

$$\hat{M} = \frac{(1 + 8\rho B_{CSQN})^{\frac{1}{2}} - 1}{4\rho B_{CSQN}},$$

and

$$\rho(c_{JSR}) = \frac{\rho_\infty c^h}{K^h + c^h}.$$

The parameters are listed in Table S9.

**Table S9. Luminal buffering parameters**

| Parameter         | Description                                     | Value             |
|-------------------|-------------------------------------------------|-------------------|
| $B_{\text{CSQN}}$ | Concentration of calsequestrin (CSQN) molecules | 460 $\mu\text{M}$ |
| $K_c$             | Dissociation constant of CSQN                   | 600 $\mu\text{M}$ |
| $n_M$             | Buffering capacitance of CSQN monomers          | 15                |
| $n_D$             | Buffering capacitance of CSQN dimers            | 35                |
| $\rho_\infty$     | Asymptotic ratio of dimers to monomers          | 5000              |
| $K$               | Dimerization constant                           | 850 $\mu\text{M}$ |
| $h$               | Dimerization exponent (steepness)               | 23                |

**2.6. SERCA pump**

ATP, ROS regulation and CaMKII activation effects on SERCA are incorporated into the model. The flux of SERCA is formulated as

$$J_{\text{up}} = v_{\text{up}} \cdot f_{\text{up,ATP}} \cdot f_{\text{up,ROS}} \frac{[\text{Ca}^{2+}]_i^2}{[\text{Ca}^{2+}]_i^2 + (k_i - \text{PLB}([\text{CaMKII}]_{\text{act}}))^2},$$

where

$$f_{\text{up,ATP}} = \frac{1}{1 + \frac{[\text{ADP}]_f}{k'_{i,\text{up}}} + \left(1 + \frac{[\text{ADP}]_f}{k_{i,\text{up}}}\right) \frac{k_{\text{mupATP}}}{[\text{ATP}]}}$$

$$f_{\text{up,ROS}} = \frac{1}{1 + \left(\frac{[\text{ROS}]}{k_{\text{d,ROS}}}\right)^{h_{\text{ROS,SERCA}}}} + \frac{0.75}{1 + \left(\frac{k_{\text{d,ROS}}}{[\text{ROS}]} \right)^{h_{\text{ROS,SERCA}}}}$$

$$\text{PLB}([\text{CaMKII}]_{\text{act}}) = \frac{\Delta k_{\text{m,up}}}{1 + \left(\frac{k_{\text{mCaMPLB}}}{[\text{CaMKII}]_{\text{act}}}\right)^{h_{\text{CaMPLB}}}}$$

The parameters are listed in Table S10.

**2.7. SR  $\text{Ca}^{2+}$  leak flux ( $J_{\text{leak}}$ )**

The Hund et al formulation (2) is used for the background SR  $\text{Ca}^{2+}$  leak flux due to CaMKII-dependent phosphorylation:

$$J_{\text{leak}} = g_{\text{leak}}(1 + \Delta k_{\text{leak}})([\text{Ca}^{2+}]_{\text{NSR}} - [\text{Ca}^{2+}]_i) \frac{[\text{Ca}^{2+}]_{\text{NSR}}^2}{[\text{Ca}^{2+}]_{\text{NSR}}^2 + k_{\text{JSR}}^2},$$

where

$$\Delta k_{\text{leak}} = \frac{k_{\text{leak,max}}}{1 + \left(\frac{k_{\text{mCaMleak}}}{[\text{CaMKII}]_{\text{act}}}\right)^{h_{\text{CaMleak}}}}$$

The parameters are listed in Table S10.

**Table S10. SERCA uptake and leak flux parameters**

| Parameter           | Description                              | Value                                  |
|---------------------|------------------------------------------|----------------------------------------|
| * $v_{\text{up}}$   | SERCA uptake strength                    | 0.3 $\mu\text{M} \cdot \text{ms}^{-1}$ |
| * $k_i$             | $K_d$ for $\text{Ca}^{2+}$ sensitivity   | 0.5 $\mu\text{M}$                      |
| $k_{i,\text{up}}$   | ADP first inhibition constant for SERCA  | 140 $\mu\text{M}$                      |
| $k'_{i,\text{up}}$  | ADP second inhibition constant for SERCA | 5100 $\mu\text{M}$                     |
| $k_{\text{mupATP}}$ | ATP half-saturation constant for SERCA   | 10 $\mu\text{M}$                       |

|                   |                                              |                                        |
|-------------------|----------------------------------------------|----------------------------------------|
| $k_{d,ROS}$       | $K_d$ for ROS inhibition on SERCA            | 50 $\mu\text{M}$                       |
| $h_{ROS,SERCA}$   | ROS inhibition exponent                      | 1                                      |
| $\Delta k_{m,up}$ | Maximal CaMKII-dependent decrease in $k_i$   | 0.17 $\mu\text{M}$                     |
| $k_{mCaMPLB}$     | $K_d$ for CaMKII activation on PLB           | 0.15                                   |
| $h_{CaMPLB}$      | Exponent of CaMKII activation on PLB         | 1                                      |
| $g_{leak}$        | Strength of leak current                     | $1.035 \times 10^{-5} \text{ ms}^{-1}$ |
| $k_{JSR}$         | $K_d$ for leak current                       | 500 $\mu\text{M}$                      |
| $k_{leak,max}$    | Maximal CaMKII-dependent increase in SR leak | 0.5                                    |
| $k_{mCaMleak}$    | $K_d$ for CaMKII activation on SR leak       | 0.15                                   |
| $h_{CaMleak}$     | Exponent of CaMKII activation on SR leak     | 1                                      |

\*  $v_{up}$  is  $0.3 \mu\text{M} \cdot \text{ms}^{-1}$  for all the simulations except for the simulations shown in Fig.7B, where its value is increased to 0.8.

\*  $k_i$  is  $0.5 \mu\text{M}$  for all the simulations except for the simulations shown in Fig.7B, where its value is decreased to 0.3.

## 2.8. Background $\text{Ca}^{2+}$ flux

$$J_{cab} = \alpha_{cab} \cdot \bar{I}_{Ca,b},$$

where  $\alpha_{cab} = \left(\frac{2Fv_i}{C_m}\right)^{-1}$  is the factor to convert the unit of pA/pF to  $\frac{\mu\text{M}}{\text{ms}}$ , and  $\bar{I}_{Ca,b}$  is the background  $\text{Ca}^{2+}$  current in a single CRU as described in Section 1.12.

## 2.9. L-type $\text{Ca}^{2+}$ channel flux

$$J_{Ca} = \alpha_{LCC} \cdot \bar{I}_{Ca,L},$$

where  $\alpha_{LCC} = \left(\frac{2Fv_p}{C_m}\right)^{-1}$  is the factor to convert the unit of pA/pF to  $\frac{\mu\text{M}}{\text{ms}}$ , and  $\bar{I}_{Ca,L}$  is the LCC current in a single CRU as described in Section 1.3.

## 2.10. $\text{Na}^+$ - $\text{Ca}^{2+}$ exchange flux

$$J_{NCX} = \alpha_{NCX} \cdot \bar{I}_{NCX},$$

where  $\alpha_{NCX} = \left(\frac{Fv_s}{C_m}\right)^{-1}$  is the factor to convert the unit of pA/pF to  $\frac{\mu\text{M}}{\text{ms}}$ , and  $\bar{I}_{NCX}$  is the  $\text{Na}^+$ - $\text{Ca}^{2+}$  exchanger current in a single CRU as described in Section 1.4.

## 2.11. $\text{Ca}^{2+}$ release flux from ryanodine receptors

$$J_r = J_{max} \cdot P_o \frac{[\text{Ca}^{2+}]_{JSR} - [\text{Ca}^{2+}]_p}{v_p},$$

where  $P_o$  is the fraction of RyR channels that are in the opening state, and  $J_{max}$  is the maximum RyR flux strength.

## 2.12. RyR gating model

The RyR model (see Fig.1B) is the same as the one by Restrepo et al (11), consisting of four states: closed CSQN-unbound (CU), open CSQN-unbound (OU), open CSQN-bound (OB), and closed CSQN-bound (CB). The rates of transition are:

$$\begin{aligned}
k_{12} &= k_{\text{base}} \cdot K_u \cdot (1 + \Delta k_{\text{CaMK}} + \Delta k_{\text{ROS}}) \cdot [\text{Ca}^{2+}]_p^2, \\
k_{14} &= \frac{\hat{M} \tau_b^{-1} B_{\text{CSQN}}}{B_{\text{CSQN},0}}, \\
k_{21} &= \tau_c^{-1}, \\
k_{23} &= \frac{\hat{M} \tau_b^{-1} B_{\text{CSQN}}}{B_{\text{CSQN},0}}, \\
k_{43} &= K_b [\text{Ca}^{2+}]_p^2, \\
k_{41} &= \tau_u^{-1}, \\
k_{34} &= \tau_c^{-1}, \\
k_{32} &= \frac{k_{41} k_{12}}{k_{43}},
\end{aligned}$$

where

$$\begin{aligned}
\Delta k_{\text{CaMK}} &= \frac{\Delta k_{\text{CaMK,max}}}{1 + \left( \frac{K_{\text{mCaMRyR}}}{[\text{CaMKII}]_{\text{act}}} \right)^{h_{\text{CaMRyR}}}}, \\
\Delta k_{\text{ROS}} &= \frac{\Delta k_{\text{ROS,max}}}{1 + \left( \frac{K_{\text{mROSRyR}}}{[\text{ROS}]} \right)^{h_{\text{ROSRyR}}}}.
\end{aligned}$$

The parameters are listed in Table S11.

**Table S11. RyR gating parameters**

| Parameter                     | Description                                 | Value                                    |
|-------------------------------|---------------------------------------------|------------------------------------------|
| $k_{\text{base}}$             | Pre-factor of $K_u$                         | 1                                        |
| $K_u$                         | CSQN-unbound opening rate                   | $0.00038 \mu\text{M}^{-2}\text{ms}^{-1}$ |
| $K_b$                         | CSQN-bound opening rate                     | $0.00005 \mu\text{M}^{-2}\text{ms}^{-1}$ |
| $B_{\text{CSQN},0}$           | Normal CSQN concentration                   | 400 $\mu\text{M}$                        |
| $\tau_u$                      | CSQN unbinding timescale                    | 125 ms                                   |
| $\tau_b$                      | CSQN binding timescale                      | 2 ms                                     |
| $\tau_c$                      | RyR closing timescale                       | 1 ms                                     |
| $\Delta k_{\text{CaMK,max}}$  | Maximal CaMKII-dependent increase in $K_u$  | 0.5                                      |
| $K_{\text{mCaMRyR}}$          | $K_d$ for CaMKII activation on $K_u$        | 0.2                                      |
| $h_{\text{CaMRyR}}$           | Exponent of CaMKII activation on $K_u$      | 1                                        |
| * $\Delta k_{\text{ROS,max}}$ | Maximal ROS-dependent increase in $K_u$     | 0.3                                      |
| $K_{\text{mROSRyR}}$          | $K_d$ for ROS-dependent increase on $K_u$   | 10 $\mu\text{M}$                         |
| $h_{\text{ROSRyR}}$           | Exponent of ROS-dependent increase on $K_u$ | 1                                        |

\*  $\Delta k_{\text{ROS,max}}$  is 0.3 for all the simulations except for the simulations shown in Fig.7B, where its value is increased to 2 to increase the leakiness of RyR, promoting  $\text{Ca}^{2+}$  waves.

### 3. Mitochondrial $\text{Ca}^{2+}$ cycling

The free  $\text{Ca}^{2+}$  concentration in a single mitochondrion is described by:

$$\frac{d[\text{Ca}^{2+}]_m}{dt} = \beta_m (J_{\text{uni}} - J_{\text{NCXm}} - J_{\text{MPTP}}),$$

where  $\beta_m$  is the  $\text{Ca}^{2+}$  buffering factor, which is described in Section 3.5. The fluxes,  $J_{\text{uni}}$ ,  $J_{\text{NCXm}}$ , and  $J_{\text{MPTP}}$ , are described below.

### 3.1. Mitochondrial uniporter $\text{Ca}^{2+}$ flux

The formulation is taken from Williams et al (12):

$$\begin{aligned} J_{\text{uni}} &= p_0 \cdot N_{\text{MCU}} \cdot \frac{i_{\text{MCU}}}{zFV_{\text{myo}}}, \\ i_{\text{MCU}} &= \frac{g_{\text{MCU,max}}}{1 + \frac{K_m}{[\text{Ca}^{2+}]}} \cdot (\Delta\psi - E_{\text{Ca,m}}), \\ E_{\text{Ca,m}} &= \frac{RT}{zF} \ln \left( \frac{[\text{Ca}^{2+}]_{\text{space}}}{[\text{Ca}^{2+}]_m} \right), \end{aligned}$$

where  $[\text{Ca}^{2+}]_{\text{space}}$  is replaced by  $[\text{Ca}^{2+}]_i$ ,  $[\text{Ca}^{2+}]_s$ , or  $[\text{Ca}^{2+}]_p$  with the mitochondrial uniporter facing the cytosolic, submembrane or dyadic space. The parameters are given in Table S12.

### 3.2. Mitochondrial $\text{Na}^+$ - $\text{Ca}^{2+}$ exchange flux

The formulation is taken from Cortassa et al (6),

$$J_{\text{NCXm}} = v_{\text{NCX,max}} \cdot \frac{e^{\frac{bF}{RT}(\Delta\psi - \psi_0)} \cdot \frac{[\text{Ca}^{2+}]_m}{[\text{Ca}^{2+}]_i}}{\left(1 + \frac{k_{\text{Na}}}{[\text{Na}^+]_i}\right)^n \cdot \left(1 + \frac{k_{\text{Ca}}}{[\text{Ca}^{2+}]_m}\right)}.$$

The parameters are given in Table S12.

### 3.3. Mitochondrial permeability transition pore flux

$$J_{\text{MPTP}} = g_{\text{MPTP}} \cdot P_{\text{MPTP}} \cdot ([\text{Ca}^{2+}]_m - [\text{Ca}^{2+}]_i),$$

where  $P_{\text{MPTP}}$  is the open probability of MPTPs, which is governed by a stochastic Markov model described below. The parameters are given in Table S12.

### 3.4. Mitochondrial permeability transition pore gating model

The MPTP gating kinetics is described by a 3-state Markov model (see Fig.1F), which was developed by Korge et al (13). The transition rates are retuned to fit recent experimental data as stated in the main text. The transition rates from  $C_0$  to  $C_1$  is mitochondrial  $\text{Ca}^{2+}$  dependent, i.e.,

$$k_{c_0c_1} = \alpha_0 \left( 1 + 199 \cdot \frac{[\text{Ca}^{2+}]_m^{\text{hMPTP}}}{[\text{Ca}^{2+}]_m^{\text{hMPTP}} + [\text{Ca}^{2+}]_0^{\text{hMPTP}}} \right),$$

The other rate constants are given in Table S12.

### 3.5. Mitochondrial $\text{Ca}^{2+}$ buffering factor

When MPTP opens, the buffering factor  $\beta_m$  is set to be  $\beta_{m,\text{on}}$ , and when MPTP closes, the buffering factor relaxes to  $\beta_{m,\text{off}}$  with a time constant  $\tau_m$ , i.e.,

$$\beta_m = \begin{cases} \beta_{m,\text{on}}, & \text{MPTP opens} \\ \beta_{m,\text{off}} - (\beta_{m,\text{off}} - \beta_m) e^{-\frac{\Delta t}{\tau_{\text{off}}}}, & \text{MPTP closes} \end{cases}$$

The parameters are given in Table S12.

**Table S12. Mitochondrial Ca<sup>2+</sup> dynamics parameters**

| Parameter              | Description                                                                     | Value                                     |
|------------------------|---------------------------------------------------------------------------------|-------------------------------------------|
| $p_0$                  | MCU open probability                                                            | 0.9                                       |
| $N_{\text{MCU}}$       | Number of MCUs per mitochondrion                                                | 200                                       |
| $v_{\text{myo}}$       | Myoplasmic volume                                                               | 18 $\mu\text{l}$                          |
| $g_{\text{MCU,max}}$   | MCU maximal conductance                                                         | 8.1 pS                                    |
| $K_m$                  | Half-saturation constant for MCU                                                | 19 mM                                     |
| $v_{\text{NCX,max}}$   | Maximal Na <sup>+</sup> -Ca <sup>2+</sup> exchanger rate                        | 0.0035 $\mu\text{M} \cdot \text{ms}^{-1}$ |
| $\psi_0$               | $\Delta\psi$ offset for Ca <sup>2+</sup> transporter                            | 91 mV                                     |
| $b$                    | Na <sup>+</sup> -Ca <sup>2+</sup> exchanger $\Delta\psi$ dependence             | 0.5                                       |
| $k_{\text{Na}}$        | $K_d$ ( $[\text{Na}^+]_i$ ) for Na <sup>+</sup> -Ca <sup>2+</sup> exchanger     | 9.4 mM                                    |
| $n$                    | Na <sup>+</sup> -Ca <sup>2+</sup> exchanger cooperativity for $[\text{Na}^+]_i$ | 3                                         |
| $k_{\text{Ca}}$        | $K_d$ ( $[\text{Ca}^{2+}]_i$ ) for Na <sup>+</sup> -Ca <sup>2+</sup> exchanger  | 0.375 $\mu\text{M}$                       |
| $g_{\text{MPTP}}$      | Maximal mPTP conductance                                                        | 100 $\text{ms}^{-1}$                      |
| $\alpha_0$             | Rate constant from $C_0$ to $C_1$                                               | 3.015<br>$\times 10^{-9} \text{ms}^{-1}$  |
| $[\text{Ca}^{2+}]_0$   | $K_d$ for Ca <sup>2+</sup> dependent opening                                    | 2 $\mu\text{M}$                           |
| $h_{\text{MPTP}}$      | Exponent for Ca <sup>2+</sup> dependent opening                                 | 5                                         |
| $\alpha_1$             | Rate constant from $C_1$ to O                                                   | $3.03 \times 10^{-7} \text{ms}^{-1}$      |
| $\beta_0$              | Rate constant from $C_1$ to $C_0$                                               | 3.015<br>$\times 10^{-7} \text{ms}^{-1}$  |
| $\beta_1$              | Rate constant from O to $C_1$                                                   | $1.5 \times 10^{-5} \text{ms}^{-1}$       |
| $\beta_{\text{m,on}}$  | Ca <sup>2+</sup> buffer capacitance when MPTP opens                             | 0.1                                       |
| $\beta_{\text{m,off}}$ | Asymptotic Ca <sup>2+</sup> buffer capacitance when MPTP closes                 | 0.01                                      |
| $\tau_{\text{off}}$    | Relaxation time constant for Ca <sup>2+</sup> buffer when MPTP closes           | 20 s                                      |

### 3.6 Mitochondrial membrane potential

We used a simple formulation for mitochondrial membrane potential ( $\Delta\psi$ ) following Korge et al (13), i.e.,

$$\begin{aligned} \frac{d\Delta\psi}{dt} &= V_{\psi S} - k_{\psi U} \cdot \Delta\psi - I_{\text{uni}} - I_{\text{NCXm}}, \\ I_{\text{uni}} &= 2 \cdot \frac{1}{C_{\text{mito}}} \cdot J_{\text{uni}}, \\ I_{\text{NCXm}} &= \frac{1}{C_{\text{mito}}} \cdot J_{\text{NaCa}}^{\text{m}}, \end{aligned}$$

where  $C_{\text{mito}} = 1.812 \mu\text{M} \cdot \text{mV}^{-1}$  is from Cortassa et al (14).  $V_{\psi S} = 3.5 \text{mV} \cdot \text{ms}^{-1}$  and  $k_{\psi U} = 0.0192 \text{ms}^{-1}$  are from Yang et al (15).

We assume that mitochondrial membrane potential is immediately depolarized to zero once the MPTP in a mitochondrion opens. Therefore, the mitochondrial membrane potential is numerically updated as follows:

$$\Delta\psi^{t+\Delta t} = \begin{cases} \Delta\psi^t + \frac{d\Delta\psi}{dt} \cdot \Delta t, & \text{if mPTP closes,} \\ 0, & \text{otherwise.} \end{cases}$$

#### 4. Cytosolic ATP

A simplified ATP model is adapted from our previous study (16). We reformulated the cytosolic ATP and ADP cycling as follows:

$$[ATP] + [ADP] = TAN,$$

$$\frac{d[ATP]}{dt} = -V_{ATP,consum} + V_{ATPase} + J_{ATP,D},$$

$$V_{ATP,consum} = k_{ATP,consum} \frac{p_{sp}}{p_{sp} + k_{d,pspconsum}},$$

where

$$p_{sp} = \frac{[ATP]}{[ADP]_f},$$

$$V_{ATPase} = k_{ATPase}(f_{\Delta\psi}f_{ADP} - g_{\Delta\psi}f_{ATP}),$$

where

$$f_{\Delta\psi} = \frac{\Delta\psi}{\Delta\psi + k_{d,\Delta\psi}},$$

$$f_{ADP} = \frac{1}{1 + k_{d,psn} \cdot p_{sp}},$$

$$g_{\Delta\psi} = 0.3(1 - f_{\Delta\psi}),$$

$$f_{ATP} = \frac{p_{sp}}{p_{sp} + k_{d,psp}}.$$

$$J_{ATP,D} = D_{ATP} \left( \frac{[ATP]^{i+1,j,k} + [ATP]^{i-1,j,k} - 2[ATP]^{i,j,k}}{\Delta x^2} + \frac{[ATP]^{i,j+1,k} + [ATP]^{i,j-1,k} + [ATP]^{i,j,k+1} + [ATP]^{i,j,k-1} - 4[ATP]^{i,j,k}}{\Delta y^2} \right),$$

$$\frac{d[ADP]_f}{dt} = \beta_{ADP}(TAN - [ATP]),$$

where  $i, j,$  and  $k$  are the indices of a CRU in the model.

The parameters are given in Table S13.

**Table S13. Cytosolic ATP and ADP parameters**

| Parameter          | Description                             | Value                                     |
|--------------------|-----------------------------------------|-------------------------------------------|
| $k_{ATP,consum}$   | ATP consumption rate constant           | $0.01 \mu\text{M} \cdot \text{ms}^{-1}$   |
| $k_{d,pspconsum}$  | Michaelis constant for $p_{sp}$         | 200                                       |
| $k_{ATPase}$       | ATP synthesis/hydrolysis rate constant  | $0.16 \mu\text{M} \cdot \text{ms}^{-1}$   |
| $k_{d,\Delta\psi}$ | Michaelis constant for $f_{\Delta\psi}$ | 150                                       |
| $k_{d,psn}$        | Michaelis constant for $f_{ADP}$        | 0.02                                      |
| $k_{d,psp}$        | Michaelis constant for $f_{ATP}$        | 0.5                                       |
| $D_{ATP}$          | Diffusion constant of ATP               | $0.25 \mu\text{m}^2 \cdot \text{ms}^{-1}$ |
| TAN                | Total ATP and ADP                       | 7000 $\mu\text{M}$                        |
| $\beta_{ADP}$      | ADP buffer term                         | 0.025                                     |

#### 5. Cytosolic reactive oxygen species (ROS)

The equation governing the cytosolic ROS level in a single CRU is the following,

$$\frac{d[\text{ROS}]}{dt} = V_{SODC} - V_{DC} + J_{\text{ROS},D},$$

where

$$V_{\text{SODC}} = \begin{cases} a_0 + \frac{K_{\text{prod}}}{1 + \left(\frac{170}{200 - \Delta\psi}\right)^9}, & \text{if the CRU is attached to a mitochondrion,} \\ 0, & \text{otherwise} \end{cases},$$

$$V_{\text{DC}} = K_{\text{DC}}[\text{ROS}],$$

$$J_{\text{ROS,D}} = D_{\text{ROS}} \left( \frac{[\text{ROS}]^{i+1,j,k} + [\text{ROS}]^{i-1,j,k} - 2[\text{ROS}]}{\Delta x^2} + \frac{[\text{ROS}]^{i,j+1,k} + [\text{ROS}]^{i,j-1,k} + [\text{ROS}]^{i,j,k+1} + [\text{ROS}]^{i,j,k-1} - 4[\text{ROS}]}{\Delta y^2} \right),$$

where  $i, j$  and  $k$  are the indices of the CRU in the model.

The parameters are given in Table S14.

**Table S14. Cytosolic ROS parameters**

| Parameter         | Description                                  | Value                                    |
|-------------------|----------------------------------------------|------------------------------------------|
| $a_0$             | Baseline production rate                     | $0.036 \mu\text{M} \cdot \text{ms}^{-1}$ |
| $K_{\text{prod}}$ | Production rate constant                     | $100 \mu\text{M} \cdot \text{ms}^{-1}$   |
| $K_{\text{DC}}$   | Degradation rate constant                    | $0.1 \text{ms}^{-1}$                     |
| $D_{\text{ROS}}$  | ROS diffusion constant                       | $1.2 \mu\text{m}^2 \cdot \text{ms}^{-1}$ |
| $\Delta x$        | CRU separation in the longitudinal direction | $1.84 \mu\text{m}$                       |
| $\Delta y$        | CRU separation in the transverse direction   | $0.9 \mu\text{m}$                        |

## 6. $\text{Ca}^{2+}$ /calmodulin-dependent protein kinase II (CaMKII) signaling

The 4-state  $\text{Ca}^{2+}$ -bound calmodulin model (see Fig.1D) is from Chiba et al (17):

$$\begin{aligned} \frac{d[\text{CaMCa}]}{dt} &= -\text{CA}_1 + \text{CA}_2, \\ \frac{d[\text{CaMCa2}]}{dt} &= -\text{CA}_2 + \text{CA}_3, \\ \frac{d[\text{CaMCa3}]}{dt} &= -\text{CA}_3 + \text{CA}_4, \\ \frac{d[\text{CaMCa4}]}{dt} &= -\text{CA}_4, \\ [\text{CaM}] &= \text{CaM}_{\text{tot}} - [\text{CaMCa}] - [\text{CaMCa2}] - [\text{CaMCa3}] - [\text{CaMCa4}], \end{aligned}$$

$$\begin{aligned} \text{CA}_1 &= -k_{1\text{CaM}} \cdot [\text{Ca}^{2+}]_i \cdot [\text{CaM}] + k_{n1\text{CaM}} \cdot [\text{CaMCa}], \\ \text{CA}_2 &= -k_{2\text{CaM}} \cdot [\text{Ca}^{2+}]_i \cdot [\text{CaMCa}] + k_{n2\text{CaM}} \cdot [\text{CaMCa2}], \\ \text{CA}_3 &= -k_{3\text{CaM}} \cdot [\text{Ca}^{2+}]_i \cdot [\text{CaMCa2}] + k_{n3\text{CaM}} \cdot [\text{CaMCa3}], \\ \text{CA}_4 &= -k_{4\text{CaM}} \cdot [\text{Ca}^{2+}]_i \cdot [\text{CaMCa3}] + k_{n4\text{CaM}} \cdot [\text{CaMCa4}], \end{aligned}$$

The CaMKII activation model (see Fig.1E) is from Foteinou et al (18),

$$\begin{aligned} \frac{d[\text{CaMKII}_{\text{CaMCa4}}]}{dt} &= A_1 - A_2 - B_1 + B_2 - E_1 + E_2, \\ \frac{d[\text{CaMKIIP}_{\text{CaMCa4}}]}{dt} &= B_1 - B_2 - C_1 + C_2 - I_2 + I_1, \end{aligned}$$

$$\begin{aligned}\frac{d[\text{CaMKIIP}]}{dt} &= C_1 - C_2 - D_1 - H_2 + H_1, \\ \frac{d[\text{CaMKII OXB}]}{dt} &= E_1 - E_2 - F_1 + F_2, \\ \frac{d[\text{CaMKII OXP}]}{dt} &= F_1 - F_2 - I_1 + I_2 - G_1 + G_2, \\ \frac{d[\text{CaMKII OXA}]}{dt} &= G_1 - G_2 + H_2 - H_1,\end{aligned}$$

$$[\text{CaMKII}] = \text{CaMKII}_{\text{tot}} - [\text{CaMKIIP}] - [\text{CaMKII}_{\text{CaM Ca4}}] - [\text{CaMKIIP}_{\text{CaM Ca4}}] - [\text{CaMKII OXB}] - [\text{CaMKII OXP}] - [\text{CaMKII OXA}],$$

$$[\text{CaMKII}]_{\text{act}} = [\text{CaMKIIP}] + [\text{CaMKII}_{\text{CaM Ca4}}] + [\text{CaMKIIP}_{\text{CaM Ca4}}] + [\text{CaMKII OXB}] + [\text{CaMKII OXP}] + [\text{CaMKII OXA}].$$

$$\begin{aligned}A_1 &= k_{\text{asso}} \cdot [\text{CaMKII}] \cdot [\text{CaM Ca4}], \\ A_2 &= [\text{CaMKII}_{\text{CaM Ca4}}] \cdot \left( k_{\text{disso}} \left( 1 - \frac{K_{\text{mCaM}}^3}{[\text{Ca}^{2+}]_i^3 + K_{\text{mCaM}}^3} \right) + k_{\text{dissoCa}} \cdot \frac{K_{\text{mCaM}}^3}{[\text{Ca}^{2+}]_i^3 + K_{\text{mCaM}}^3} \right), \\ B_1 &= k_{\text{cat37c}} \cdot P \cdot \frac{[\text{ATP}]}{[\text{ATP}] + K_{\text{mATP}}} \cdot [\text{CaMKII}_{\text{CaM Ca4}}], \\ P &= 1 - \left( \frac{[\text{CaMKII}]}{\text{CaMKII}_{\text{tot}}} \right)^2, \\ B_2 &= k_{\text{catpp1new}} \cdot \text{PP1} \cdot \frac{[\text{CaMKIIP}_{\text{CaM Ca4}}]}{[\text{CaMKIIP}_{\text{CaM Ca4}}] + K_{\text{mPP1}}}, \\ k_{\text{catpp1new}} &= k_{\text{catpp1}} \cdot \frac{1}{1 + \frac{[\text{ROS}]}{K_{\text{mROS}}}}, \\ C_1 &= [\text{CaMKIIP}_{\text{CaM Ca4}}] \cdot \left( k_{\text{disso2}} \left( 1 - \frac{K_{\text{mCaM}}^3}{[\text{Ca}^{2+}]_i^3 + K_{\text{mCaM}}^3} \right) + k_{\text{dissoCa2}} \cdot \frac{K_{\text{mCaM}}^3}{[\text{Ca}^{2+}]_i^3 + K_{\text{mCaM}}^3} \right), \\ C_2 &= k_{\text{asso}} \cdot [\text{CaMKIIP}] \cdot [\text{CaM Ca4}], \\ D_1 &= k_{\text{catpp1new}} \cdot \text{PP1} \cdot \frac{[\text{CaMKIIP}]}{[\text{CaMKIIP}] + K_{\text{mPP1}}}, \\ E_1 &= k_{\text{ox}} \cdot [\text{CaMKII}_{\text{CaM Ca4}}] \cdot [\text{ROS}], \\ E_2 &= k_{\text{MsrA}} \cdot [\text{CaMKII OXB}], \\ F_1 &= k_{\text{cat37c}} \cdot P \cdot \frac{[\text{ATP}]}{[\text{ATP}] + K_{\text{mATP}}} \cdot [\text{CaMKII OXB}], \\ F_2 &= k_{\text{catpp1new}} \cdot \text{PP1} \cdot \frac{[\text{CaMKII OXP}]}{[\text{CaMKII OXP}] + K_{\text{mPP1}}}, \\ I_1 &= k_{\text{MsrA}} \cdot [\text{CaMKII OXP}], \\ I_2 &= k_{\text{ox}} \cdot [\text{CaMKIIP}_{\text{CaM Ca4}}] \cdot [\text{ROS}], \\ G_1 &= [\text{CaMKII OXP}] \cdot \left( k_{\text{disso2}} \left( 1 - \frac{K_{\text{mCaM}}^3}{[\text{Ca}^{2+}]_i^3 + K_{\text{mCaM}}^3} \right) + k_{\text{dissoCa2}} \cdot \frac{K_{\text{mCaM}}^3}{[\text{Ca}^{2+}]_i^3 + K_{\text{mCaM}}^3} \right), \\ G_2 &= k_{\text{asso}} \cdot [\text{CaMKII OXA}] \cdot [\text{CaM Ca4}], \\ H_1 &= k_{\text{MsrA}} \cdot [\text{CaMKII OXA}], \\ H_2 &= k_{\text{ox}} \cdot [\text{CaMKIIP}] \cdot [\text{ROS}].\end{aligned}$$

The parameters are given in Table S15.

**Table S15. Ca<sup>2+</sup>-bound calmodulin and CaMKII activation parameters**

| Parameter             | Description                                                                       | Value                                                |
|-----------------------|-----------------------------------------------------------------------------------|------------------------------------------------------|
| CaM <sub>tot</sub>    | Total calmodulin concentration                                                    | 50 $\mu\text{M}$                                     |
| k <sub>1CaM</sub>     | Calcium binding rate 1                                                            | 0.0025 $\mu\text{M}^{-1}\text{ms}^{-1}$              |
| k <sub>n1CaM</sub>    | Calcium unbinding rate 1                                                          | 0.05 $\text{ms}^{-1}$                                |
| k <sub>2CaM</sub>     | Calcium binding rate 2                                                            | 0.08825 $\mu\text{M}^{-1}\text{ms}^{-1}$             |
| k <sub>n2CaM</sub>    | Calcium unbinding rate 2                                                          | 0.05 $\text{ms}^{-1}$                                |
| k <sub>3CaM</sub>     | Calcium binding rate 3                                                            | 0.0125 $\mu\text{M}^{-1}\text{ms}^{-1}$              |
| k <sub>n3CaM</sub>    | Calcium unbinding rate 3                                                          | 1.25 $\text{ms}^{-1}$                                |
| k <sub>4CaM</sub>     | Calcium binding rate 4                                                            | 0.25 $\mu\text{M}^{-1}\text{ms}^{-1}$                |
| k <sub>n4CaM</sub>    | Calcium unbinding rate 4                                                          | 1.25 $\text{ms}^{-1}$                                |
| CaMKII <sub>tot</sub> | Total CaMKII concentration                                                        | 1 $\mu\text{M}$                                      |
| k <sub>asso</sub>     | CaM <sub>Ca4</sub> association rate                                               | 0.0021 $\mu\text{M}^{-1}\text{ms}^{-1}$              |
| k <sub>disso</sub>    | Dissociation rate of CaM <sub>Ca4</sub> from CaMKII_CaM <sub>Ca4</sub> pathway 1  | $7 \times 10^{-5} \text{ms}^{-1}$                    |
| k <sub>dissoCa</sub>  | Dissociation rate of CaM <sub>Ca4</sub> from CaMKII_CaM <sub>Ca4</sub> pathway 2  | $9.5 \times 10^{-4} \text{ms}^{-1}$                  |
| k <sub>disso2</sub>   | Dissociation rate of CaM <sub>Ca4</sub> from CaMKIIP_CaM <sub>Ca4</sub> pathway 1 | $7 \times 10^{-8} \text{ms}^{-1}$                    |
| k <sub>dissoCa2</sub> | Dissociation rate of CaM <sub>Ca4</sub> from CaMKIIP_CaM <sub>Ca4</sub> pathway 2 | $9.5 \times 10^{-7} \text{ms}^{-1}$                  |
| K <sub>mCaM</sub>     | Half saturation of Ca dissociation from from CaMKII_CaM <sub>Ca4</sub>            | 0.03 $\mu\text{M}$                                   |
| k <sub>cat37c</sub>   | Phosphorylation rate constant at 37 °C                                            | $5.4 \times 10^{-3} \text{ms}^{-1}$                  |
| K <sub>mATP</sub>     | Michaelis constant for the CaMKII-ATP complex                                     | 19.1 $\mu\text{M}$                                   |
| k <sub>catpp1</sub>   | Dephosphorylation rate constant                                                   | $1.72 \times 10^{-3} \text{ms}^{-1}$                 |
| K <sub>mROS</sub>     | Michaelis constant for the ROS-mediated autophosphorylation                       | 1 $\mu\text{M}$                                      |
| K <sub>mPP1</sub>     | Michaelis constant for the PP1-CaMKII complex                                     | 11 $\mu\text{M}$                                     |
| k <sub>ox</sub>       | Oxidation dependent rate                                                          | $1.28 \times 10^{-5} \mu\text{M}^{-1}\text{ms}^{-1}$ |
| k <sub>MsrA</sub>     | Reductase rate mediated by methionine sulfoxide reductase A                       | $10^{-4} \text{ms}^{-1}$                             |
| PP1                   | PP1 concentration                                                                 | 1 $\mu\text{M}$                                      |

**Supporting References**

1. Mahajan, A., Y. Shiferaw, D. Sato, A. Baher, R. Olcese, L. H. Xie, M. J. Yang, P. S. Chen, J. G. Restrepo, A. Karma, A. Garfinkel, Z. Qu, and J. N. Weiss. 2008. A rabbit ventricular action potential model replicating cardiac dynamics at rapid heart rates. *Biophys J* 94(2):392-410.
2. Hund, T. J., K. F. Decker, E. Kanter, P. J. Mohler, P. A. Boyden, R. B. Schuessler, K. A. Yamada, and Y. Rudy. 2008. Role of activated CaMKII in abnormal calcium homeostasis and I(Na) remodeling after myocardial infarction: insights from mathematical modeling. *J Mol Cell Cardiol* 45(3):420-428.

3. Xie, A., Z. Song, H. Liu, A. Zhou, G. Shi, Q. Wang, L. Gu, M. Liu, L. H. Xie, Z. Qu, and S. C. Dudley, Jr. 2018. Mitochondrial Ca(2+) Influx Contributes to Arrhythmic Risk in Nonischemic Cardiomyopathy. *J Am Heart Assoc* 7(8).
4. Bers, D. M., and S. Morotti. 2014. Ca(2+) current facilitation is CaMKII-dependent and has arrhythmogenic consequences. *Front Pharmacol* 5:144.
5. Hund, T. J., and Y. Rudy. 2004. Rate dependence and regulation of action potential and calcium transient in a canine cardiac ventricular cell model. *Circulation* 110(20):3168-3174.
6. Cortassa, S., M. A. Aon, B. O'Rourke, R. Jacques, H. J. Tseng, E. Marban, and R. L. Winslow. 2006. A computational model integrating electrophysiology, contraction, and mitochondrial bioenergetics in the ventricular myocyte. *Biophys J* 91(4):1564-1589.
7. Matsuoka, S., N. Sarai, H. Jo, and A. Noma. 2004. Simulation of ATP metabolism in cardiac excitation-contraction coupling. *Prog Biophys Mol Biol* 85(2-3):279-299.
8. Shannon, T. R., F. Wang, J. Puglisi, C. Weber, and D. M. Bers. 2004. A mathematical treatment of integrated Ca dynamics within the ventricular myocyte. *Biophys J* 87(5):3351-3371.
9. Song, Z., C. Y. Ko, M. Nivala, J. N. Weiss, and Z. Qu. 2015. Calcium-voltage coupling in the genesis of early and delayed afterdepolarizations in cardiac myocytes. *Biophys J* 108(8):1908-1921.
10. Song, Z., Z. Qu, and A. Karma. 2017. Stochastic initiation and termination of calcium-mediated triggered activity in cardiac myocytes. *Proc Natl Acad Sci U S A* 114(3):E270-E279.
11. Restrepo, J. G., J. N. Weiss, and A. Karma. 2008. Calsequestrin-mediated mechanism for cellular calcium transient alternans. *Biophys J* 95(8):3767-3789.
12. Williams, G. S., L. Boyman, A. C. Chikando, R. J. Khairallah, and W. J. Lederer. 2013. Mitochondrial calcium uptake. *Proc Natl Acad Sci U S A* 110(26):10479-10486.
13. Korge, P., L. Yang, J. H. Yang, Y. Wang, Z. Qu, and J. N. Weiss. 2011. Protective role of transient pore openings in calcium handling by cardiac mitochondria. *J Biol Chem* 286(40):34851-34857.
14. Cortassa, S., M. A. Aon, E. Marban, R. L. Winslow, and B. O'Rourke. 2003. An integrated model of cardiac mitochondrial energy metabolism and calcium dynamics. *Biophys J* 84(4):2734-2755.
15. Yang, L., P. Korge, J. N. Weiss, and Z. Qu. 2010. Mitochondrial oscillations and waves in cardiac myocytes: insights from computational models. *Biophys J* 98(8):1428-1438.
16. Yang, J. H., L. Yang, Z. Qu, and J. N. Weiss. 2008. Glycolytic oscillations in isolated rabbit ventricular myocytes. *J Biol Chem* 283(52):36321-36327.
17. Chiba, H., N. S. Schneider, S. Matsuoka, and A. Noma. 2008. A simulation study on the activation of cardiac CaMKII delta-isoform and its regulation by phosphatases. *Biophys J* 95(5):2139-2149.
18. Foteinou, P. T., J. L. Greenstein, and R. L. Winslow. 2015. Mechanistic Investigation of the Arrhythmogenic Role of Oxidized CaMKII in the Heart. *Biophys J* 109(4):838-849.
